# Supplementary material
Source: Springer Nature journal article supplement (https://www.springermedizin.de/resource/supplementary/13023_2009_171_MOESM1_ESM.pdf/9641864)

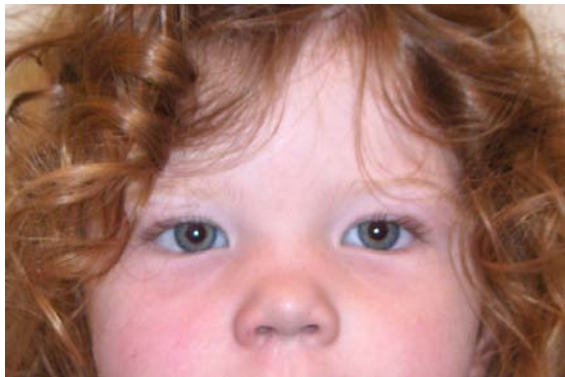

a.

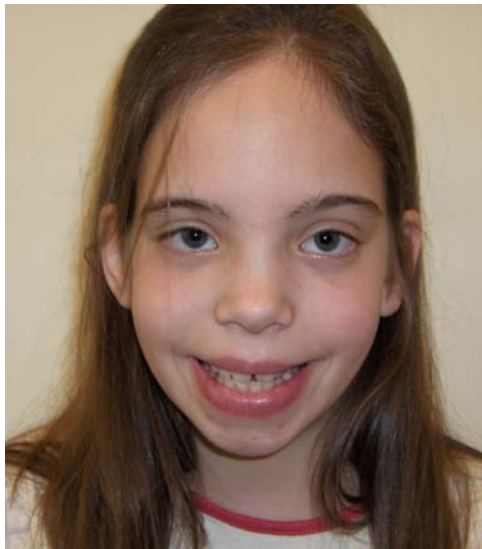

b.

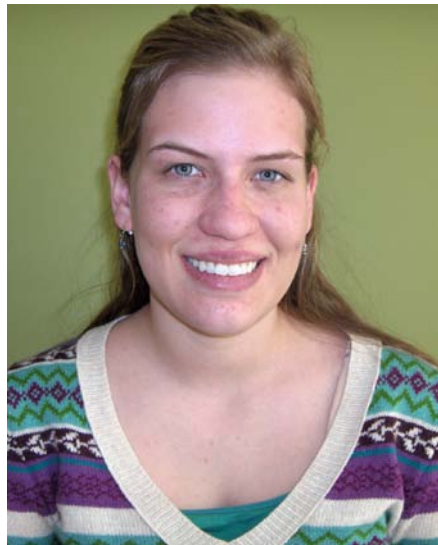

c.

Supplement: MOESM1 [file 9641864]
